# Supplementary material for: Molecular Investigation of DKK3 in Cerebral Ischemic/Reperfusion Injury
Source: MDPI journal article supplement (doi:10.3390/biomedicines11030815), 2023-03-07

### S1. Analysis of ischemic brain area

In particular, the infarct volume was of the 8.2% in animals sacrificed after 1 h from the end of the occlusion, 23% in animals sacrificed after 6 h from the end of the occlusion, 34.4% in animals sacrificed after 12 h from the end of the of the occlusion and 46.6% in animals sacrificed after 24 h from the end of the occlusion.

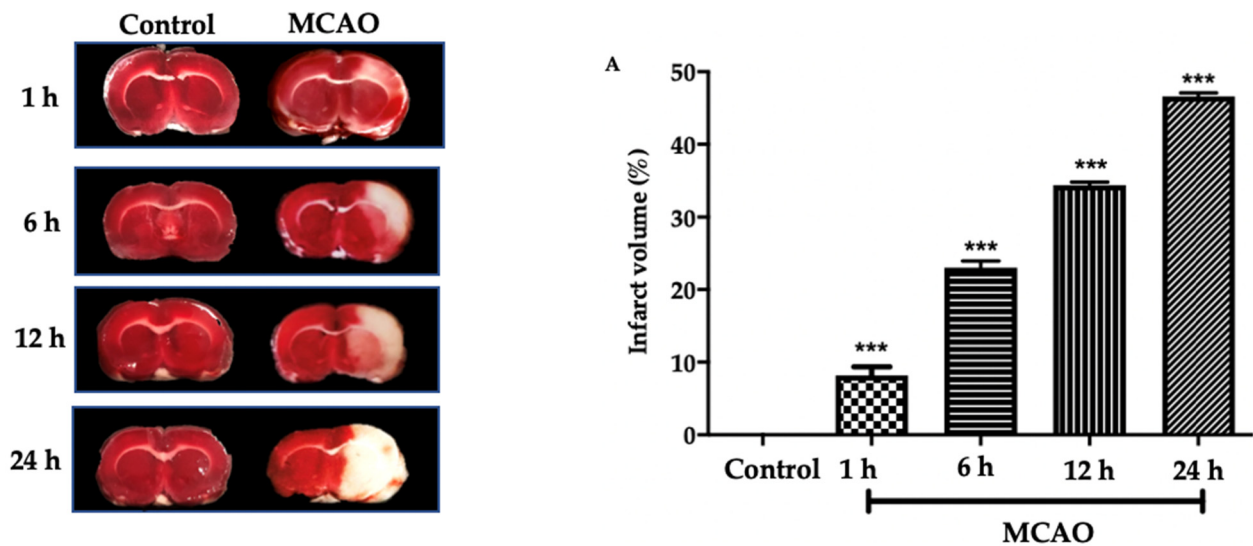

Supplement: s1 [file s1]
